# Supplementary material
Source: MDPI journal article supplement (https://www.mdpi.com/2076-3417/11/16/7194)
Supplement: s1 [file s1]

# Supplement material

**Table S1.** VLF receiving and transmitting sites.

|                                   | Freq(kHz) | Country | Geographic<br>latitude (deg) | Geographic<br>longitude(deg) | GCP(km) | propagation<br>path       |
|-----------------------------------|-----------|---------|------------------------------|------------------------------|---------|---------------------------|
| <b>Transmitter:</b><br><b>GQD</b> | 22.10     | UK      | 54.73 N                      | 2.88 W                       | 1982    | Northwest<br>to southeast |
| <b>Receiver:</b><br><b>BEL</b>    |           | Serbia  | 44.85 N                      | 20.38 E                      |         |                           |

09 Sep 2017

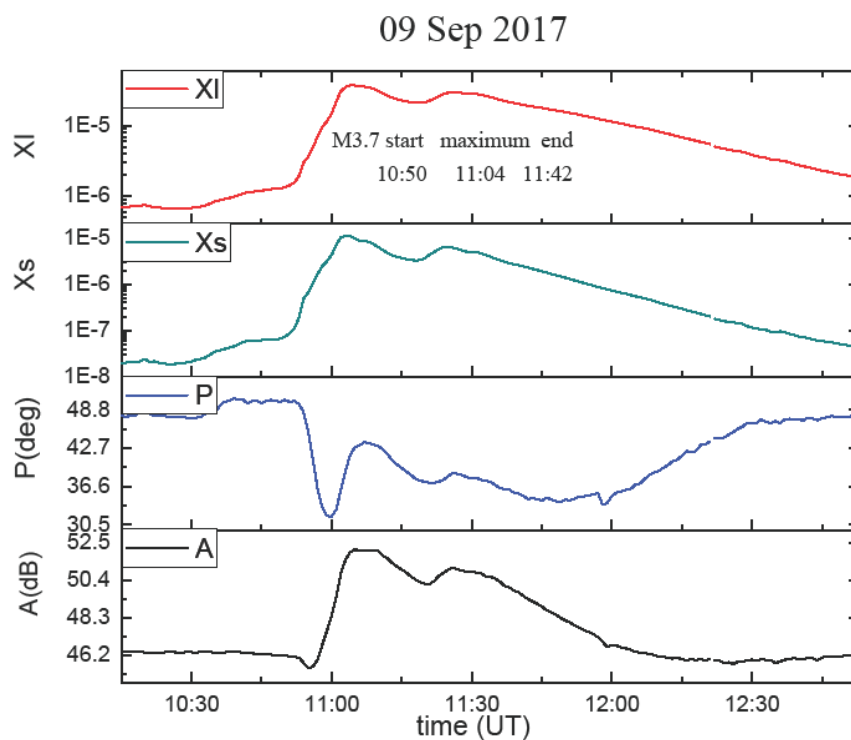

**Figure S1.** X-ray flux (XS and XL band), amplitude and phase of 22.10/kHz GQD signal against universal time during occurrence of M3.7 class solar flare on 09 Sep 2017. (lower panels) Observed amplitude and phase of radio signals measured at Belgrade (upper panels) Time variation of X-ray irradiance measured by GOES-15 satellite on 09 Sep 2017.

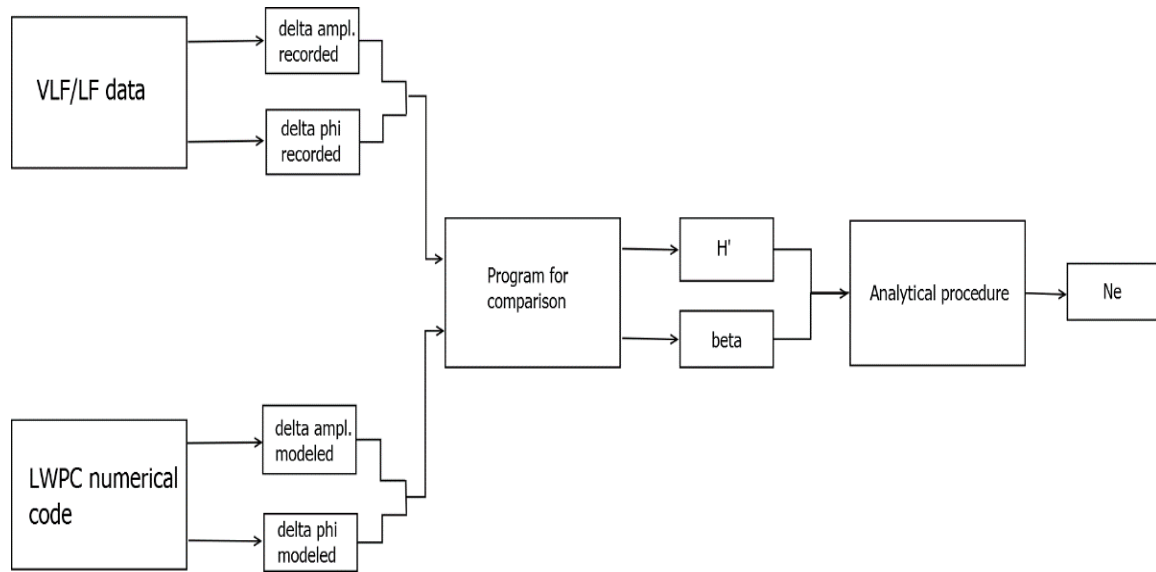

**Figure S2.** Schematic presentation of a method for modeling of electron density in D-region.

**Table S2.** Data needed for the approximative function (3).

| Height (km) | a1(h)    | a2(h)   | a3(h)   |
|-------------|----------|---------|---------|
| 50          | 10.3249  | 0.97123 | 0.06168 |
| 51          | 10.84938 | 1.10778 | 0.07203 |
| 52          | 11.37386 | 1.24433 | 0.08237 |
| 53          | 11.89835 | 1.38089 | 0.09272 |
| 54          | 12.42283 | 1.51744 | 0.10306 |
| 55          | 12.94731 | 1.65399 | 0.11341 |
| 56          | 13.47179 | 1.79054 | 0.12375 |
| 57          | 13.99627 | 1.92709 | 0.1341  |
| 58          | 14.52076 | 2.06364 | 0.14444 |
| 59          | 15.04524 | 2.20019 | 0.15479 |
| 60          | 15.56972 | 2.33674 | 0.16513 |
| 61          | 16.0942  | 2.4733  | 0.17548 |
| 62          | 16.61868 | 2.60985 | 0.18582 |
| 63          | 17.14317 | 2.7464  | 0.19617 |
| 64          | 17.66765 | 2.88295 | 0.20651 |
| 65          | 18.19213 | 3.0195  | 0.21686 |
| 66          | 18.71661 | 3.15605 | 0.2272  |
| 67          | 19.2411  | 3.2926  | 0.23755 |
| 68          | 19.76558 | 3.42915 | 0.24789 |
| 69          | 20.29006 | 3.56571 | 0.25824 |
| 70          | 20.81454 | 3.70226 | 0.26858 |
| 71          | 21.33902 | 3.83881 | 0.27893 |
| 72          | 21.86351 | 3.97536 | 0.28927 |
| 73          | 22.38799 | 4.11191 | 0.29962 |

|    |          |         |         |
|----|----------|---------|---------|
| 74 | 22.91247 | 4.24846 | 0.30996 |
| 75 | 23.43695 | 4.38501 | 0.32031 |
| 76 | 23.96143 | 4.52156 | 0.33065 |
| 77 | 24.48592 | 4.65812 | 0.341   |
| 78 | 25.0104  | 4.79467 | 0.35134 |
| 79 | 25.53488 | 4.93122 | 0.36169 |
| 80 | 26.05936 | 5.06777 | 0.37203 |

One of the largest solar flare :

measured with instruments occurred on 28 Oct 2003 (X17.2 class SF,  $I_x = 1.72 \text{ E-3 Wm}^{-2}$ ).

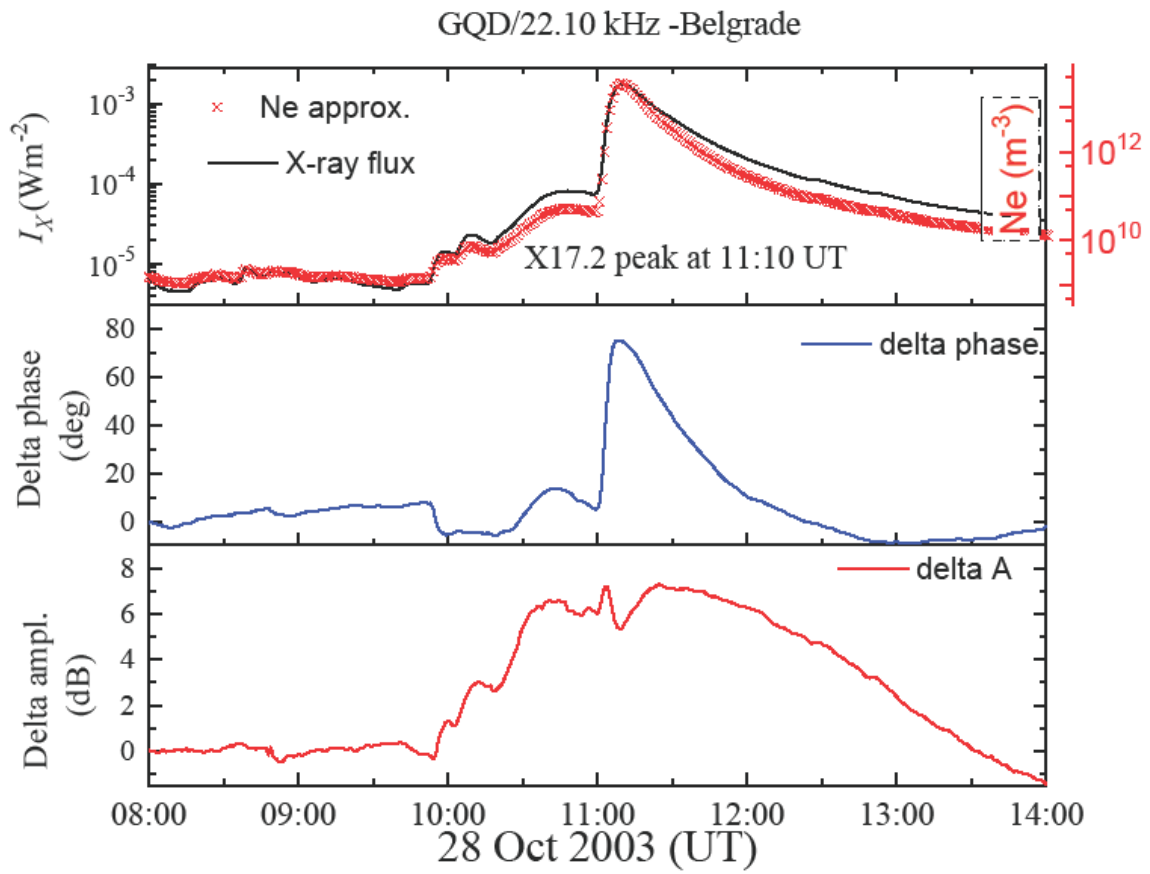

**Figure S3.** (upper panel) Variation of X-ray flux, as measured by GOES-15 satellite, and the corresponding electron density evaluated (Equation 3) at reference height versus universal time UT on 28 Oct 2003 during occurrence of huge X17.2 class solar flare. (lower panels) Perturbation of amplitudes and perturbation of phases on the same day.

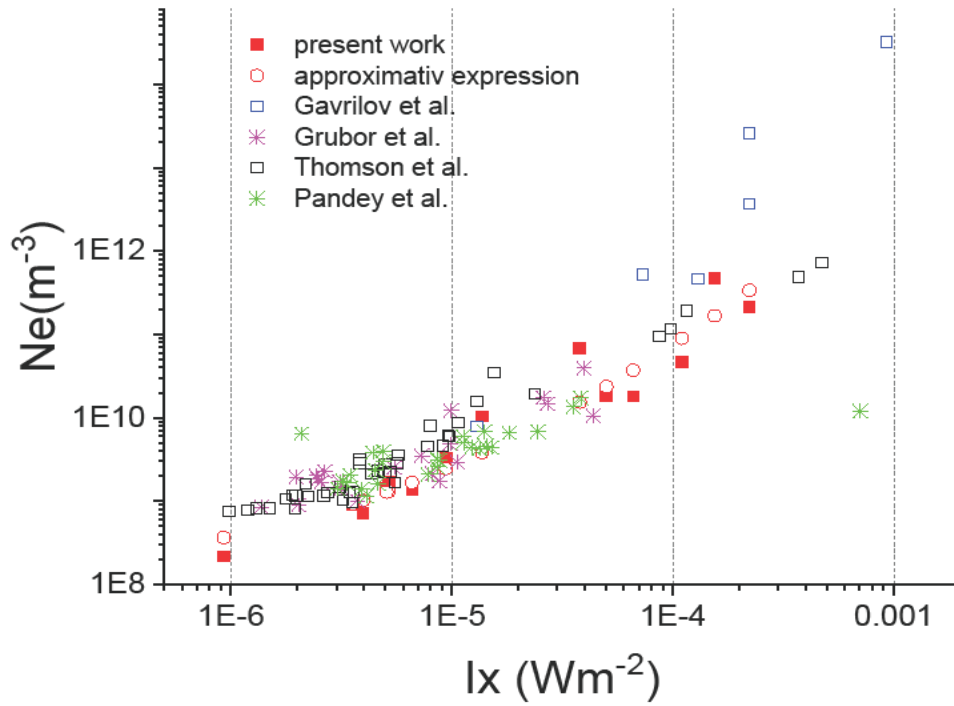

**Figure S4.** The electron density  $Ne$  at reference height (red squares) calculated for this study and data obtained by approximativ formula (3) (red circles) are plotted together with the results of other authors [53-56] using Equation (1) and parameters in Figures 12 and 13 from the main text.

**Table S3.** Data of amplitude and phase perturbations of VLF signal and ionospheric parameters induced by different SF events analyzed in this study.

| Path: GQD-BEL |                   |                              |                    |                     |                                            |              |                            |
|---------------|-------------------|------------------------------|--------------------|---------------------|--------------------------------------------|--------------|----------------------------|
| Date          | Peak Time<br>[UT] | $I_x$<br>[Wm <sup>-2</sup> ] | SID VLF<br>data    |                     | Obtained data<br>by method from this paper |              |                            |
|               |                   |                              | $\Delta A$<br>[dB] | $\Delta P$<br>[deg] | $\beta$<br>[km <sup>-1</sup> ]             | $H'$<br>[km] | $Ne$<br>[m <sup>-3</sup> ] |
|               |                   | 5E-7                         | 0                  | 0                   | 0.30                                       | 74.0         | 2.18E+8                    |
| 2013/04/26    | 12:57             | <u>C3.57</u><br>3.57E-6      | -1.85              | -3.0                | 0.36                                       | 70.0         | 9.12E+8                    |
| 2014/06/10    | 08:25             | <u>C3.9</u><br>3.97E-6       | -1.5               | +0.1                | 0.36                                       | 70.7         | 7.09E+8                    |
| 2014/06/10    | 10:17             | <u>C5.0</u><br>5.06E-6       | -0.5               | -9.0                | 0.39                                       | 69.1         | 1.46E+9                    |
| 2014/06/10    | 09:31             | <u>C5.1</u><br>5.18E-6       | -2.0               | -7.0                | 0.41                                       | 68.95        | 1.71E+9                    |

|            |       |                         |       |       |      |       |          |
|------------|-------|-------------------------|-------|-------|------|-------|----------|
| 2013/05/01 | 14:14 | <u>C6.6</u><br>6.6E-6   | -1.9  | -6.9  | 0.38 | 69.1  | 1.39E+9  |
| 2011/02/14 | 12:53 | <u>C9.4</u><br>9.4E-6   | -1.5  | -14.0 | 0.42 | 67.5  | 3.31E+9  |
| 2013/05/10 | 12:56 | <u>M1.3</u><br>1.37E-5  | +0.85 | -19.4 | 0.45 | 65.4  | 1.04E+10 |
| 2017/09/09 | 11:04 | <u>M3.7</u><br>3.78E-5  | +5.6  | -5.6  | 0.49 | 62.5  | 6.7E+10  |
| 2013/05/22 | 13:32 | <u>M5.0</u><br>5.0E-5   | +2.64 | -17.0 | 0.46 | 64.4  | 1.79E+10 |
| 2011/02/18 | 10:11 | <u>M6.61</u><br>6.61E-5 | +3.51 | -9.0  | 0.44 | 63.95 | 1.80E+10 |
| 2014/06/11 | 09:06 | <u>X1.1</u><br>1.1E-4   | +5.1  | +5.0  | 0.46 | 62.3  | 4.70E+10 |
| 2014/06/10 | 12:52 | <u>X 1.5</u><br>1.55E-4 | +7.4  | +15.0 | 0.53 | 61.0  | 2.12E+11 |
| 2014/06/10 | 11:42 | <u>X2.2</u><br>2.22E-4  | +7.3  | +32.0 | 0.52 | 59.2  | 4.75E+11 |
